# Supplementary material
Source: Royal Society of Chemistry journal article supplement (doi:10.1039/d6fo01629d)

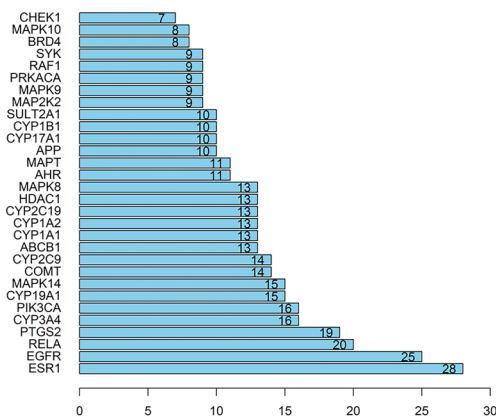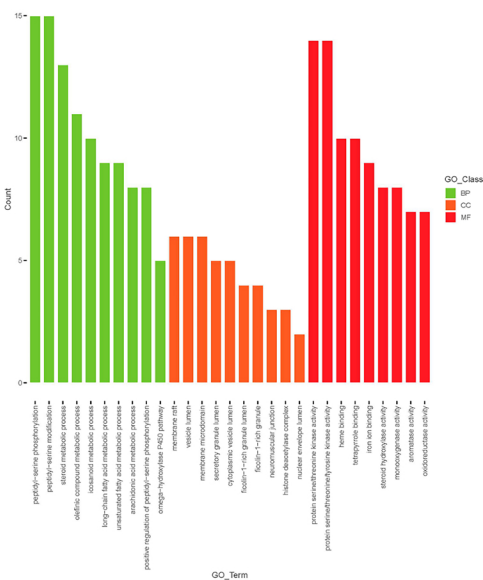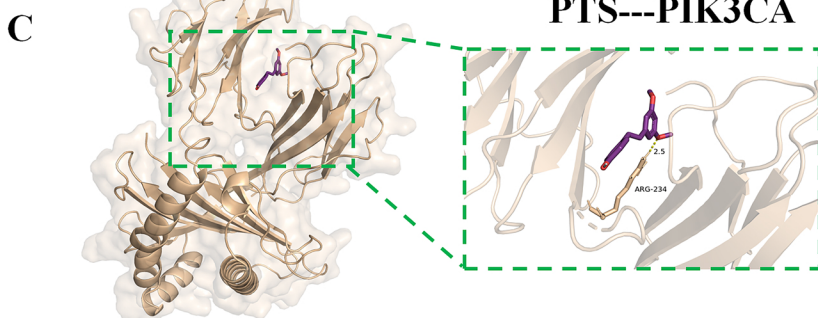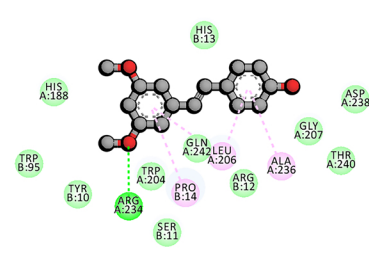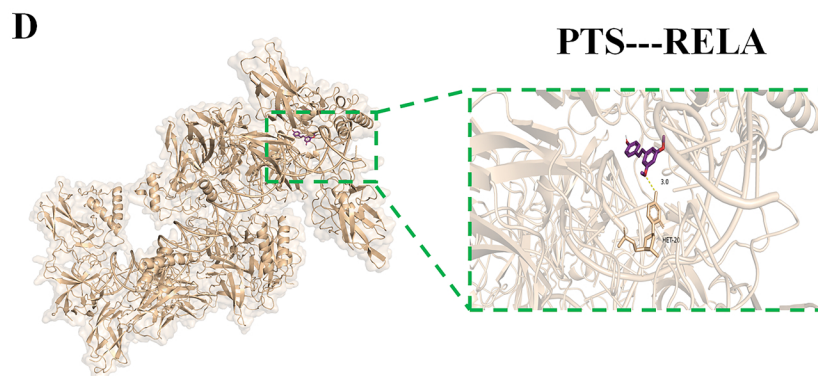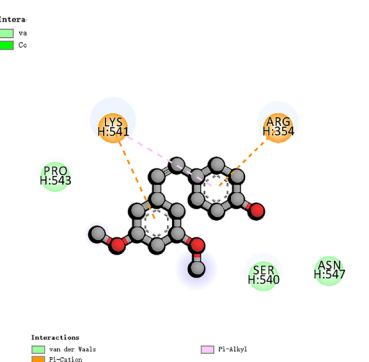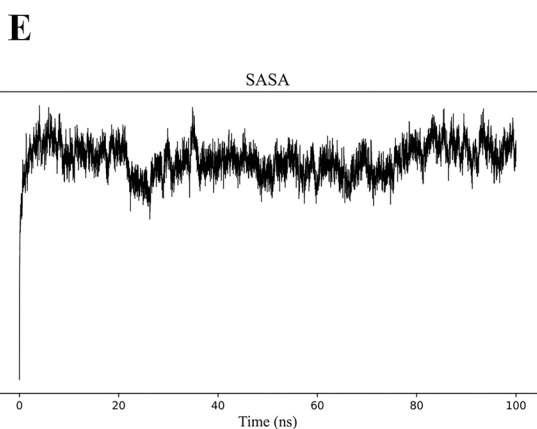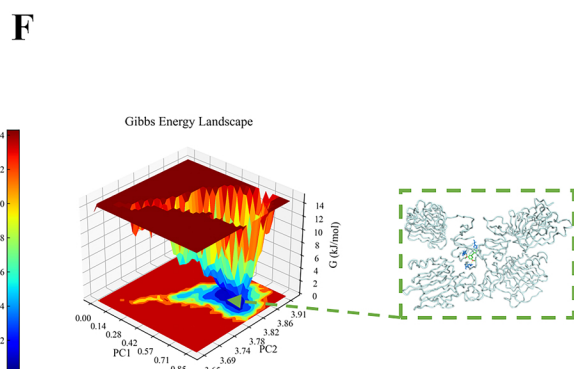

Supplement: d6fo01629d2.pdf [file d6fo01629d2.pdf]
